# Supplementary material for: ELF5 Drives Lung Metastasis in Luminal Breast Cancer through Recruitment of Gr1+ CD11b+ Myeloid-Derived Suppressor Cells
Source: PLoS Biol. 2015 Dec 30;13(12):e1002330. doi: 10.1371/journal.pbio.1002330 (PMC4696735; doi:10.1371/journal.pbio.1002330)
Supplement: S4 Data — (XLSX) [file pbio.1002330.s004.xlsx]

## Sheet: Fig 7B
%
	PyMT/WT Pre	PyMT/Elf5 Pre	PyMT/WT 1 week Tx	PyMT/Elf5 1 week Tx	PyMT/WT 2 week Tx	PyMT/Elf5 2 week Tx
	33.7	13.5	0.048	0.2	0.32	0.38
	17.9	18.5	0.004	0.18	0.066	0.35
	35.9	23	0.18	0.12	0.084	0.36
	35.3	11.3	0.068		0.12	0.074
	21.6	6.5			0.84	0.27

## Sheet: Fig 7C
		PyMT/WT	PyMT/ELF5
	Exp1	0.43	0.31
		2.49	3.22
		1.01	0.55
		0.48
	Exp2	1.5	0.2
		1.9	0.52
		1.27	0.45
		4.04
		0.75
	Exp3	5.75	3.72
			2.97
	Exp4	0.24	1.39
			0.42
	Exp5	0.45	0.22
		0.07
